# Supplementary material for: Cross-Sectional and Longitudinal Performance of Non-Invasive Tests of Liver Fibrosis in Patients with Non-Alcoholic Fatty Liver Disease
Source: MDPI journal article supplement (doi:10.3390/jcm12020650), 2023-01-13
Supplement: s1 [file s1]

**Supplementary Table S1.** Correlations between PRO-C3 and ADAPT with the other non-invasive scores of hepatic fibrosis and Liver Stiffness.

| Non-invasive scores   | PRO-C3 (ng/mL)  | ADAPT           |
|-----------------------|-----------------|-----------------|
|                       | <i>rs</i>       | <i>rs</i>       |
|                       | <i>p</i> -Value | <i>p</i> -Value |
| FIB-4                 | 0.49<br><0.0001 | 0.65<br><0.0001 |
| NFS                   | 0.47<br><0.0001 | 0.81<br><0.0001 |
| APRI                  | 0.46<br><0.0001 | 0.10<br>0.3232  |
| Liver stiffness (kPa) | 0.45<br><0.0001 | 0.48<br><0.0001 |

Data are reported as Spearman coefficient (*rs*) and *p*-Value. ADAPT, PRO-C3 based score; APRI, aspartate aminotransferase (AST) to platelet ratio index; FIB-4, fibrosis score 4; NFS, non-alcoholic fatty liver disease fibrosis score; PRO-C3, N-terminal propeptide of type III collagen.

**Supplementary Table S2.** Comparison between AUROCs.

| $\Delta$ variables        | $\Delta$ AUROCs (95% CI) | <i>p</i> -Value |
|---------------------------|--------------------------|-----------------|
| LS <i>vs.</i> NFS         | 0.035 (-0.102-0.171)     | 0.6175          |
| LS <i>vs.</i> PRO-C3      | 0.095 (-0.032-0.222)     | 0.1437          |
| LS <i>vs.</i> ADAPT       | 0.020 (-0.106-0.145)     | 0.7562          |
| <b>Combinations</b>       |                          |                 |
| LS <i>vs.</i> LS + NFS    | 0.051 (-0.031-0.134)     | 0.223           |
| LS <i>vs.</i> LS + PRO-C3 | 0.004 (-0.029-0.037)     | 0.8147          |
| LS <i>vs.</i> LS + ADAPT  | 0.033 (-0.047-0.114)     | 0.4202          |

Differences between the AUROCs were assessed by DeLong test. ADAPT, PRO-C3 based score; LS, liver stiffness; NFS, non-alcoholic fatty liver disease fibrosis score; PRO-C3, N-terminal pro-peptide of type III collagen.

**Supplementary Table S3.** Diagnostic accuracy of FIB-4, NFS, APRI, PRO-C3 and ADAPT alone or in combination with liver stiffness for the identification of significant fibrosis ( $F > 2$ ).

| Non-invasive tests  | AUROC<br>(95% CI)   | Cut-off | Se (%) | Sp (%) | PPV (%) | NPV(%) | LR+  | LR-  |
|---------------------|---------------------|---------|--------|--------|---------|--------|------|------|
| FIB-4               | 0.643 (0.539-0.738) | 1.04    | 56     | 70     | 63      | 64     | 1.88 | 0.62 |
| NFS                 | 0.698 (0.594-0.788) | -2.05   | 64     | 71     | 67      | 69     | 2.26 | 0.50 |
| APRI                | 0.619 (0.514-0.716) | 0.39    | 56     | 64     | 59      | 61     | 1.57 | 0.68 |
| PRO-C3 (ng/mL)      | 0.654 (0.550-0.749) | 5.4     | 100    | 26     | 55      | 100    | 1.35 | -    |
| ADAPT               | 0.681 (0.578-0.772) | 4.68    | 50     | 82     | 72      | 64     | 2.78 | 0.61 |
| LS, (kPa)           | 0.757 (0.659-0.839) | 10.1    | 46     | 94     | 88      | 65     | 7.61 | 0.58 |
| <b>Combinations</b> |                     |         |        |        |         |        |      |      |
| LS + FIB-4          | 0.743 (0.644-0.827) | 0.53    | 50     | 92     | 85      | 67     | 6.25 | 0.54 |
| LS + NFS            | 0.764 (0.665-0.845) | 0.46    | 60     | 84     | 77      | 70     | 3.68 | 0.48 |
| LS + APRI           | 0.753 (0.655-0.835) | 0.53    | 52     | 92     | 86      | 68     | 6.52 | 0.52 |
| LS + PRO-C3 (ng/mL) | 0.749 (0.650-0.832) | 0.43    | 65     | 72     | 68      | 69     | 2.33 | 0.48 |
| LS + ADAPT          | 0.747 (0.648-0.831) | 0.59    | 46     | 96     | 91      | 66     | 11.4 | 0.67 |

Cut-off values derived from the Youden index. ADAPT, PRO-C3 based score; APRI, aspartate aminotransferase (AST) to platelet ratio index; AUROC, area under the receiver operating characteristic curve; FIB-4, fibrosis score 4; LR+, positive likelihood ratio; LR-, negative likelihood ratio; LS, liver stiffness; NFS, non-alcoholic fatty liver disease fibrosis score; NPV, negative predictive value; PPV, positive predictive value; PRO-C3, N-terminal pro-peptide of type III collagen; Se, sensitivity; Sp, specificity.

**Supplementary Table S4.** Differences between baseline and follow-up variables according to the follow-up change in liver stiffness.

| $\Delta$ variables      | No change in<br>LS   | Improvement in<br>LS | <i>p</i> -Value |
|-------------------------|----------------------|----------------------|-----------------|
|                         | Median<br>(95% CI)   | Median<br>(95% CI)   |                 |
| $\Delta$ FIB-4          | -0.06 (-0.18-0.22)   | 0.05 (-0.09-0.25)    | 0.284           |
| $\Delta$ NFS            | -0.11 (-0.37-0.20)   | -0.14 (-0.34-0.36)   | 0.856           |
| $\Delta$ APRI           | 0.02 (-0.03-0.10)    | 0.06 (0.01-0.27)     | 0.275           |
| $\Delta$ PRO-C3 (ng/mL) | -2.85 (-4.50- -0.95) | -1.45 (-6.00-2.20)   | 0.649           |
| $\Delta$ ADAPT          | -0.5 (-1.30- -0.10)  | -0.25 (-1.50-0.90)   | 0.716           |

ADAPT, PRO-C3 based score; ALT, alanine aminotransferase; AST, aspartate aminotransferase; BMI, body mass index; Chol, cholesterol; FIB-4, fibrosis score 4; HDL, high density lipoprotein cholesterol; NFS, non-alcoholic fatty liver disease fibrosis score; PRO-C3, N-terminal propeptide of type III collagen.

**Supplementary Table S5.** Comparison of non-invasive tests between baseline and follow-up, stratified for significant fibrosis.

| Non-invasive scores | F0–F1 (N = 22)     |                   |                | F2–F4 (N = 28)   |                  |                |
|---------------------|--------------------|-------------------|----------------|------------------|------------------|----------------|
|                     | Baseline           | Follow up         | <i>P value</i> | Baseline         | Follow up        | <i>P value</i> |
| LS, kPa             | 5.8 (4.9-7.7)      | 5.5 (4.6-7.0)     | 0.1327         | 11.2 (7.4-15.2)  | 6.2 (5.0-9.1)    | 0.0001         |
| FIB-4               | 0.75 (0.52-0.99)   | 0.79 (0.58-1.02)  | 0.5057         | 1.11 (0.76-1.58) | 1.15 (0.87-1.74) | 0.6488         |
| NFS                 | 0.76 (-0.30- 1.38) | 0.74 (-0.02-2.05) | 0.6148         | 2.00 (0.75-3.36) | 2.24 (0.87-3.36) | 0.3016         |
| APRI                | 0.28 (0.19-0.35)   | 0.28 (0.19-0.38)  | 0.2113         | 0.41 (0.29-0.71) | 0.33 (0.29-0.47) | 0.1791         |
| PRO-C3, ng/mL       | 9.9 (6.3-13.2)     | 13.3 (11.2-16.3)  | 0.005          | 12.5 (9.1-18.6)  | 14.2 (11.9-19.4) | 0.4123         |
| ADAPT               | 4.5 (3.5-5.9)      | 5.1 (4.3-6.2)     | 0.006          | 9.9 (4.1-13.7)   | 8.2 (5.2-15.3)   | 0.3550         |

Data are reported as median and 95% confidence interval (CI). ADAPT, PRO-C3 based score; APRI, aspartate aminotransferase (AST) to platelet ratio index; FIB-4, fibrosis score 4; NFS, non-alcoholic fatty liver disease fibrosis score; PRO-C3, N-terminal propeptide of type III collagen.

**Supplementary Figure S1.** Comparison of the area under the receiver operating characteristic curve of non-invasive scores, PRO-C3 and liver stiffness for advanced fibrosis.

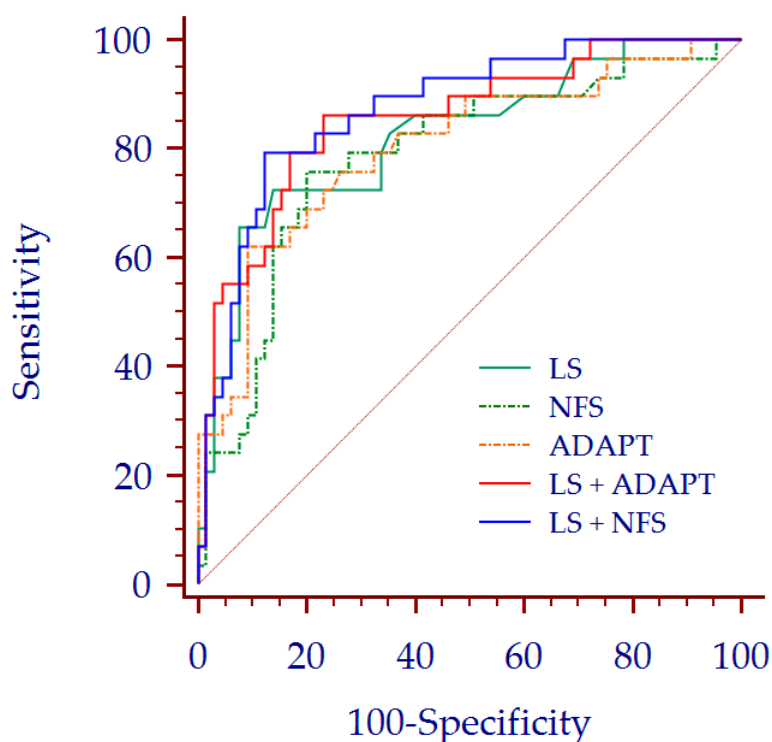

ADAPT, PRO-C3 based score; LS, liver stiffness; NFS, non-alcoholic fatty liver disease fibrosis score.

**Supplementary Figure S2.** Comparison of the area under the receiver operating characteristic curve of non-invasive scores, PRO-C3 and liver stiffness for significant fibrosis.

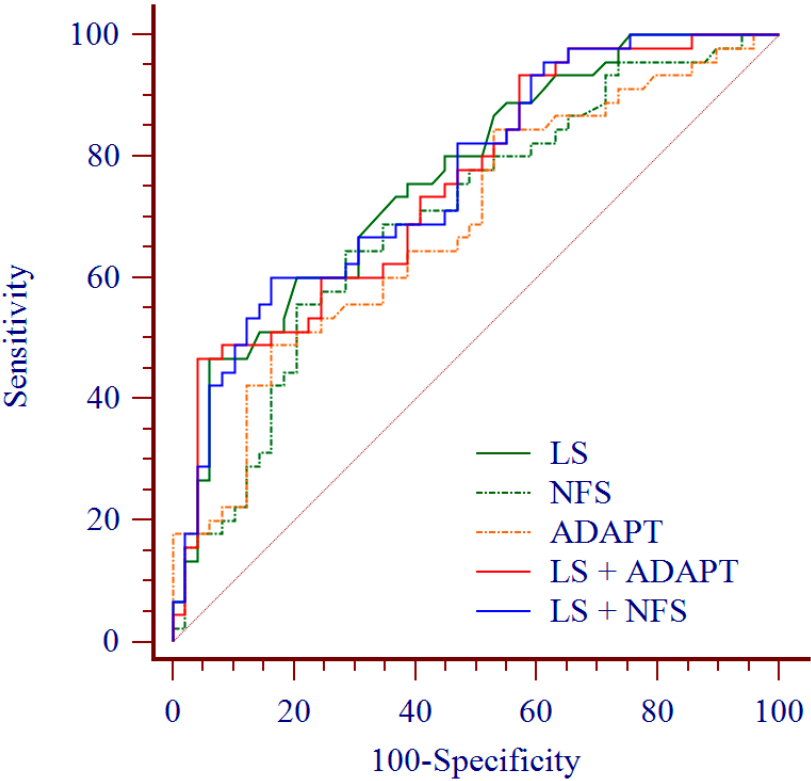

ADAPT, PRO-C3 based score; LS, liver stiffness; NFS, non-alcoholic fatty liver disease fibrosis score.
